# Supplementary material for: Idiopathic short stature due to novel heterozygous mutation of the aggrecan gene
Source: publisher site journal article supplement (doi:10.1515/jpem-2014-0450), 2015-01-01
Supplement: Supplementary file 1 [file Suppl figure1.doc]

Suppl Figure 1: DNA Analysis
